# Supplementary material for: Branched Chain Amino Acid Supplementation to a Hypocaloric Diet Does Not Affect Resting Metabolic Rate but Increases Postprandial Fat Oxidation Response in Overweight and Obese Adults after Weight Loss Intervention
Source: MDPI journal article supplement (doi:10.3390/nu13124245), 2021-11-26
Supplement: s1 [file s1]

**Table S1. Baseline characteristics of study participants in the three diet groups**

| Parameters                      | CT (n=37) | BCAA (n=35) | HP (n=39)  | <i>p</i> |
|---------------------------------|-----------|-------------|------------|----------|
| Age (years)                     | 34.7±7.77 | 32.0±6.79   | 31.1±6.53  | 0.072    |
| Sex (Male/Female)               | 18/19     | 17/18       | 20/19      | 0.965    |
| Weight (kg)                     | 80.6±10.9 | 83.93±12.71 | 82.2±13.08 | 0.507    |
| BMI (kg/m <sup>2</sup> )        | 29.4±2.31 | 29.8±2.69   | 29.7±3.14  | 0.860    |
| Waist circumference (cm)        | 94.1±7.58 | 96.0±6.82   | 96.4±8.42  | 0.391    |
| Body fat percentage (%)         | 39.2±5.47 | 39.2±5.78   | 38.9±5.57  | 0.967    |
| Total body fat mass (kg)        | 30.9±5.20 | 32.1±5.60   | 31.1±5.16  | 0.601    |
| Total body lean mass (kg)       | 45.9±8.59 | 47.9±9.82   | 47.2±10.1  | 0.656    |
| Systolic blood pressure (mmHg)  | 119±10    | 116±10      | 117±9      | 0.288    |
| Diastolic blood pressure (mmHg) | 77±10     | 75±6        | 77±7       | 0.519    |
| RMR (kcal/day)                  | 1570±238  | 1610±273    | 1600±300   | 0.753    |
| Fat oxidation (%)               | 54.5±22.1 | 58.4±17.0   | 53.7±22.9  | 0.588    |
| Carbohydrate oxidation (%)      | 46.0±22.1 | 42.1±17.0   | 46.8±22.9  | 0.593    |
| RQ                              | 0.84±0.08 | 0.83±0.05   | 0.84±0.07  | 0.608    |
| Total cholesterol (mmol/L)      | 4.83±0.66 | 4.63±0.61   | 4.77±0.77  | 0.442    |
| Triglycerides (mmol/L)          | 1.06±0.39 | 1.18±0.55   | 1.16±0.48  | 0.537    |
| HDL cholesterol (mmol/L)        | 1.24±0.18 | 1.25±0.32   | 1.20±0.25  | 0.625    |
| LDL (mmol/L)                    | 3.10±0.56 | 2.84±0.55   | 3.05±0.61  | 0.139    |
| Fasting glucose (mmol/L)        | 4.90±0.38 | 4.78±0.32   | 4.85±0.42  | 0.383    |
| Fasting insulin (mU/L)          | 8.44±4.31 | 8.58±5.80   | 7.93±4.29  | 0.829    |
| HOMA-IR                         | 1.88±1.09 | 1.82±1.19   | 1.73±0.99  | 0.820    |

Data presented as mean ± SD or N. One-way ANOVA with Bonferroni correction and Chi-square test were used to compare differences in continuous and categorical parameters respectively, among the 3 diet groups.

Abbreviations: Body mass index, BMI; Resting metabolic rate, RMR; Respiratory quotient, RQ; High-density lipoprotein, HDL; Low-density lipoprotein, LDL; Homeostatic model assessment of insulin resistance, HOMA-IR.



**Table S2. Clinical characteristics of study participants before (week 0) and after (week 16) dietary weight loss intervention**

| Parameters                      | Week 0 (N=111) | Week 16 (N=111) | <i>p</i> |
|---------------------------------|----------------|-----------------|----------|
| Age (years)                     | 32.6±7.15      | 32.6±7.15       | -        |
| Sex (male/female)               | 55/56          | 55/56           | -        |
| Weight (kg)                     | 82.2±12.2      | 75.7±12.4       | <0.0005  |
| BMI (kg/m <sup>2</sup> )        | 29.6±2.72      | 27.3±2.86       | <0.0005  |
| Waist circumference (cm)        | 95.5±7.66      | 88.6±7.72       | <0.0005  |
| Body fat percentage (%)         | 39.1±5.55      | 36.6±5.95       | <0.0005  |
| Total body fat mass (kg)        | 31.4±5.29      | 27.1±5.79       | <0.0005  |
| Total body lean mass (kg)       | 47.0±9.49      | 44.9±9.19       | <0.0005  |
| Systolic blood pressure (mmHg)  | 117±10         | 114±10          | <0.0005  |
| Diastolic blood pressure (mmHg) | 77±8           | 73±10           | <0.0005  |
| RMR (kcal/day)                  | 1600±270       | 1500±264        | <0.0005  |
| Fat oxidation (%)               | 55.4±20.8      | 55.6±20.1       | 0.950    |
| Carbohydrate oxidation (%)      | 45.1±20.8      | 44.9±20.1       | 0.950    |
| RQ                              | 0.84±0.07      | 0.84±0.07       | 0.930    |
| Total cholesterol (mmol/L)      | 4.74±0.68      | 4.43±0.73       | <0.0005  |
| Triglycerides (mmol/l)          | 1.13±0.47      | 0.96±0.38       | <0.0005  |
| HDL cholesterol (mmol/L)        | 1.23±0.5       | 1.16±0.24       | <0.0005  |
| LDL cholesterol (mmol/L)        | 3.00±0.58      | 2.84±0.61       | <0.0005  |
| Fasting glucose (mmol/L)        | 4.85±0.38      | 4.68±0.36       | <0.0005  |
| Fasting insulin (mU/L)          | 8.30±4.79      | 4.95±2.67       | <0.0005  |
| HOMA-IR                         | 1.81±1.08      | 1.04±0.58       | <0.0005  |

Data presented as mean ± SD or N. Paired t-test and Chi-square test were used to compare differences in continuous and categorical parameters respectively, between week 0 and week 16.

Abbreviations: Body mass index, BMI; Resting metabolic rate, RMR; Respiratory quotient, RQ; High-density lipoprotein, HDL; Low-density lipoprotein, LDL; Homeostatic model assessment of insulin resistance, HOMA-IR.



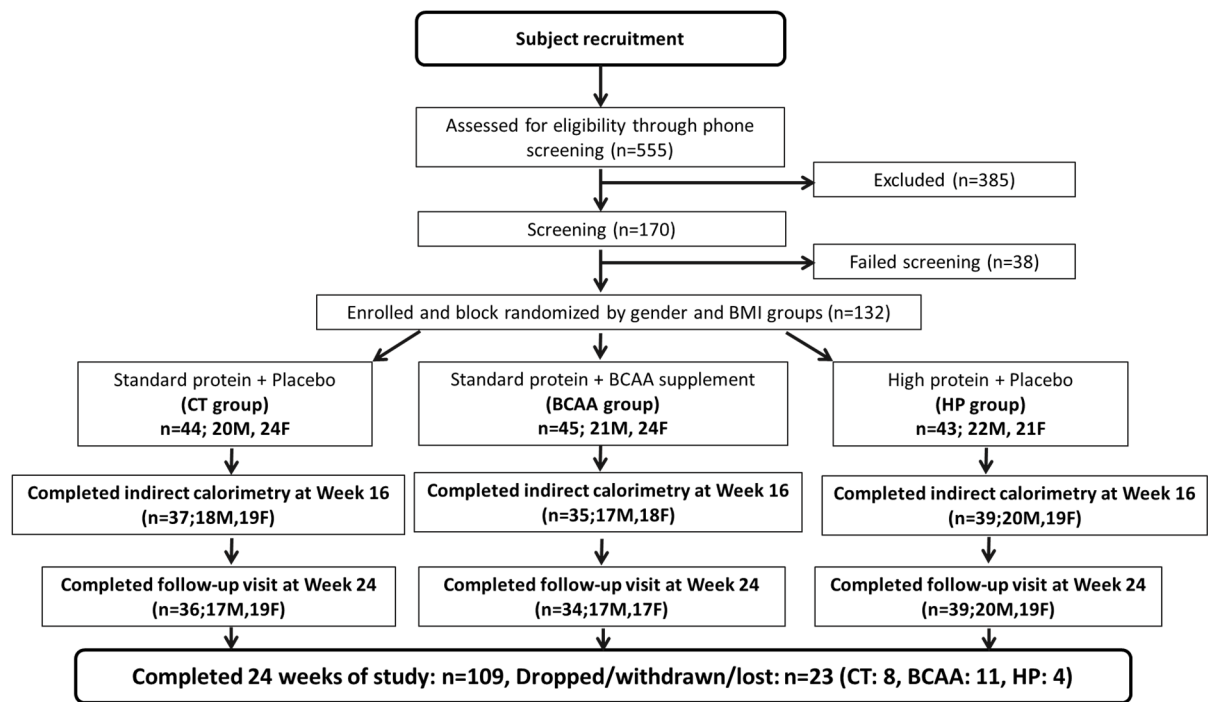

**Figure S1.** Consort diagram for recruitment, screening, enrolment and randomization of study subjects. One hundred and eleven subjects (55 men, 56 women) completed indirect calorimetry after 16 weeks of diet intervention. One hundred and nine subjects (54 men, 55 women) completed the 24-week intervention study. Twenty-three subjects did not complete the study: 1 subject was uncontactable for her last study visit at week 24; 8 subjects self-withdrew as they were unable to comply with our strict diet plan and 3 self-withdrew due to inability to commit to study visits (because of family, work or personal commitments); 4 subjects were dropped because they achieved  $<1.8\text{kg}$  weight loss at week 4 which is indicative of poor compliance, 6 were withdrawn by the principal investigator (PI) for health or medical reasons not directly related to this intervention and 1 was withdrawn by the PI for non-compliance with diet. M = male, F = female.



**A**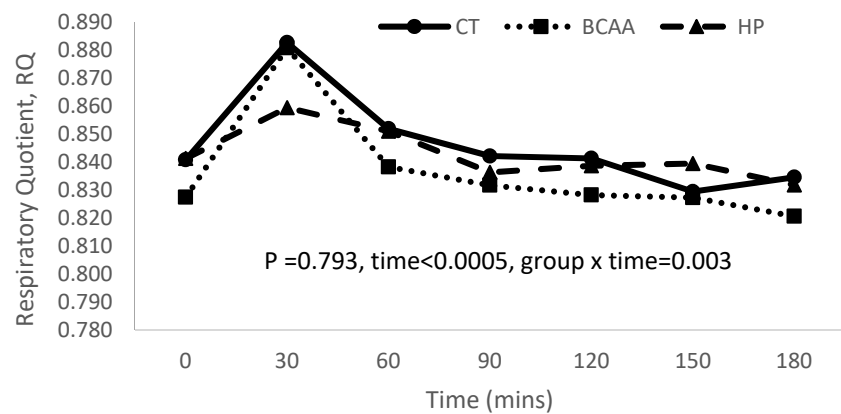**B**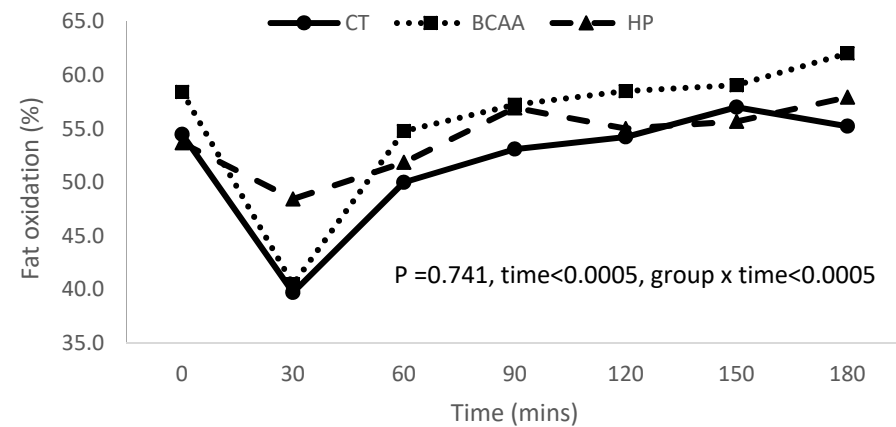**C**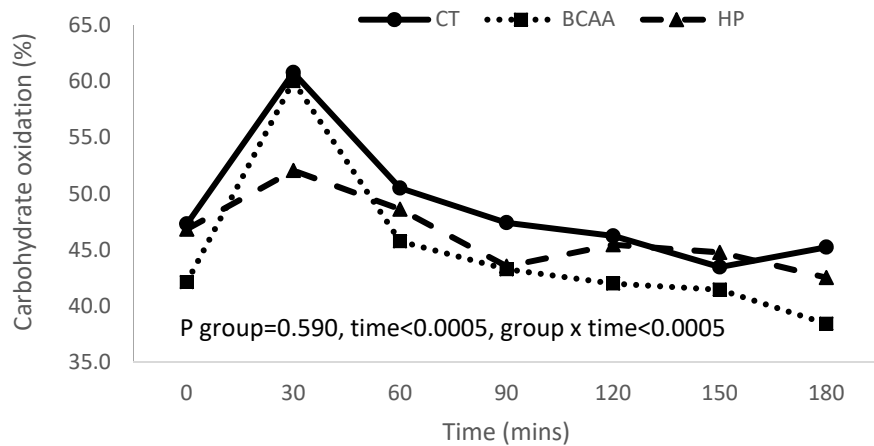**D**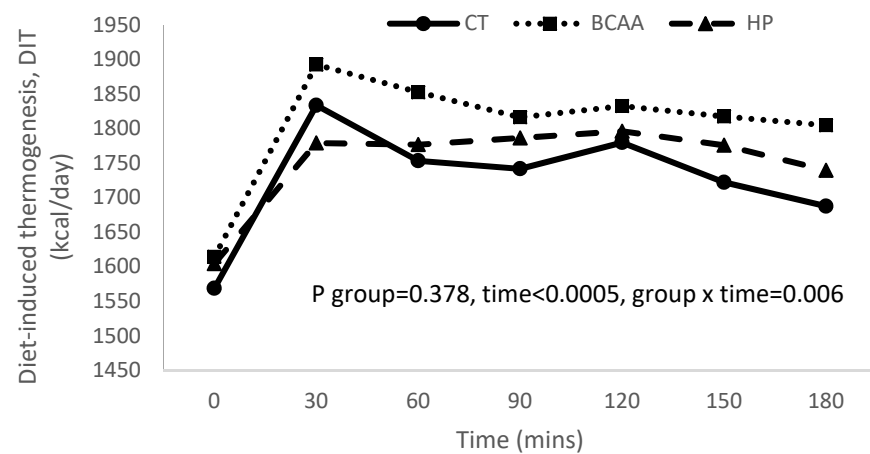



**Figure S2. Postprandial RQ, fat oxidation, carbohydrate oxidation and DIT responses among the three diet groups at baseline (Week 0).**

A: Postprandial RQ responses among the 3 diet groups; B: Postprandial fat oxidation responses among the 3 diet groups; C: Postprandial carbohydrate oxidation responses among the 3 diet groups; D: Postprandial DIT responses among the 3 diet groups. Data was analysed by repeated measures ANOVA (between subject groups)

Abbreviations: Standard-protein with BCAA, BCAA; Standard-protein with placebo, CT; Diet-induced thermogenesis, DIT; High-protein with placebo, HP; Respiratory quotient, RQ
